# Supplementary material
Source: publisher figshare collection journal article supplement (https://acs.figshare.com/ndownloader/files/11502590)
Supplement: Supplementary file 1 [file 11502590]

**Synthesis of Heterobimetallic Complexes by Coordination of Rhodium(III) and Iridium(III) Poly-N,O-NHC Complexes to Silver(I), Copper(II) and Zinc(II)**

Michael Tegethoff, Florian Roelfes, Christian Schulte to Brinke, Tristan Tsai Yuan Tan, Florian Kampert, Guo-Xin Jin,<sup>b</sup> and F. Ekkehardt Hahn<sup>\*</sup>

<sup>a</sup>Institut für Anorganische und Analytische Chemie, Westfälische Wilhelms-Universität Münster, Corrensstraße 28/30, 48149 Münster, Germany

<sup>b</sup>Department of Chemistry, Fudan University, Shanghai 200433, P. R. China

**Table of Contents:**

Table of Contents:

|                        |    |
|------------------------|----|
| 1. NMR spectra of [2]  | S2 |
| 2. NMR spectra of [3]  | S3 |
| 3. NMR spectra of [4]  | S4 |
| 4. NMR spectra of [5]  | S5 |
| 5. NMR spectra of [6]  | S6 |
| 6. NMR spectra of [10] | S7 |

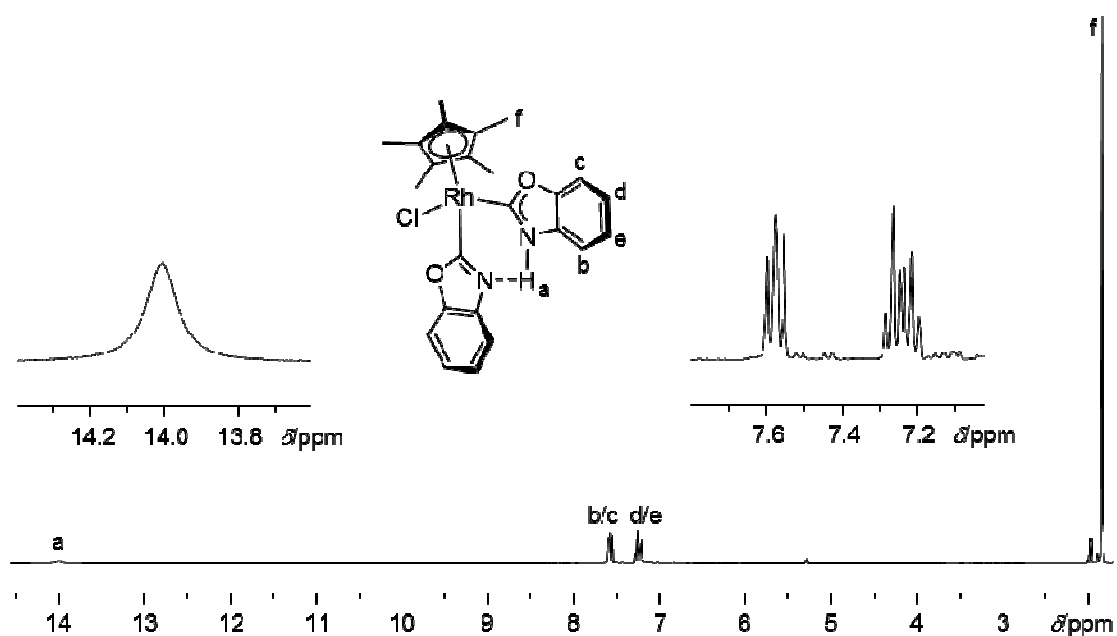

**Figure S1.**  $^1\text{H}$  NMR spectrum of [2] in  $\text{CDCl}_3$ .

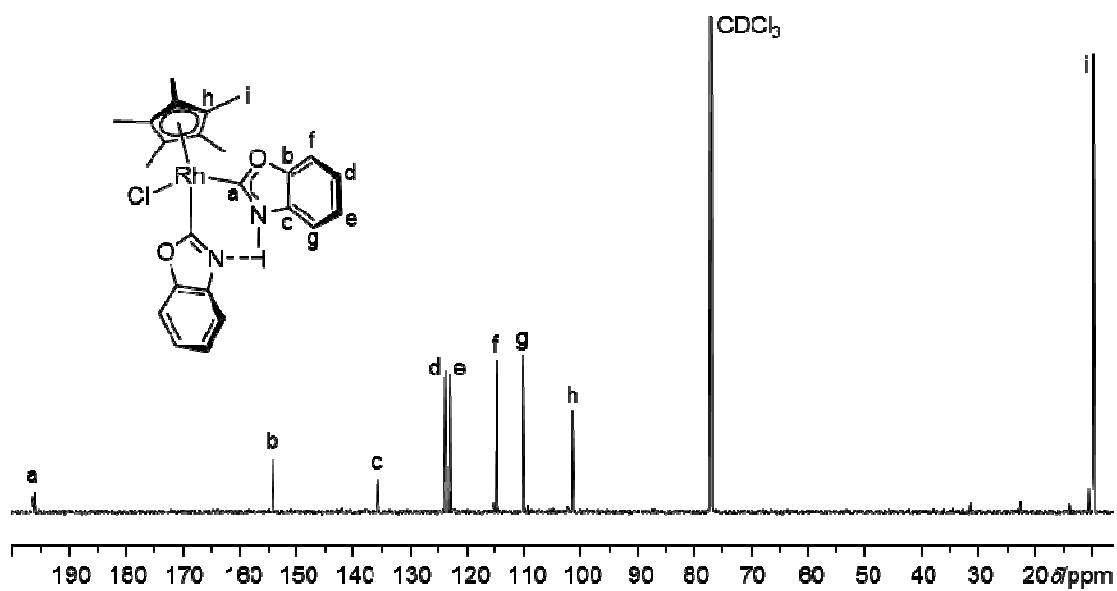

**Figure S2.**  $^{13}\text{C}\{^1\text{H}\}$  NMR spectrum of [2] in  $\text{CDCl}_3$ .

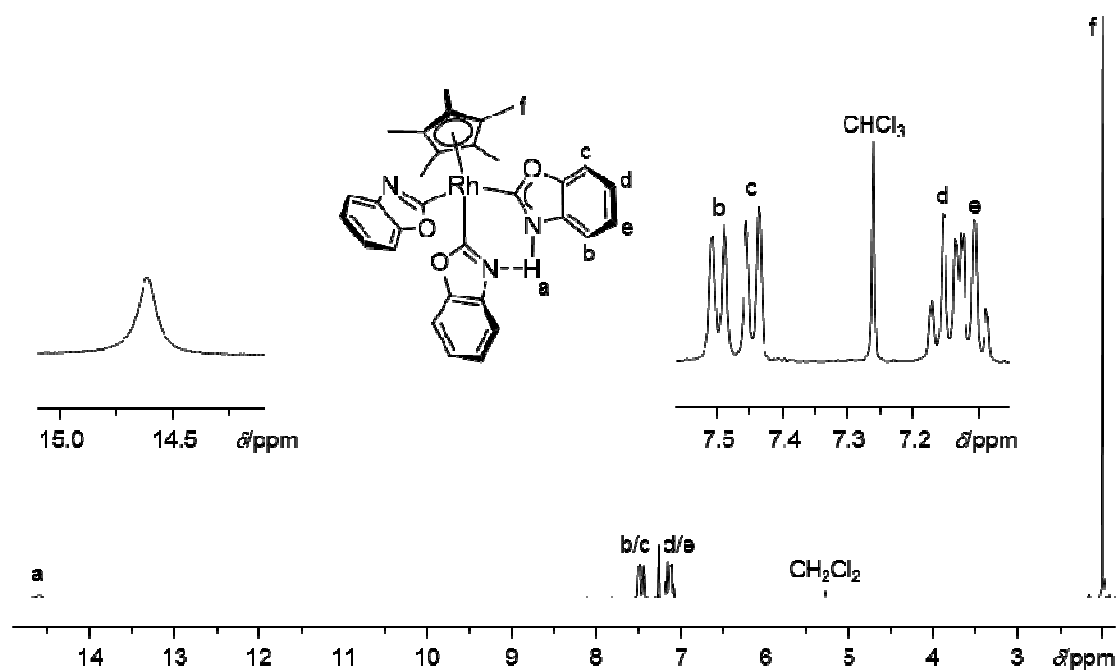

**Figure S3.**  $^1\text{H}$  NMR spectrum of [3] in  $\text{CDCl}_3$ .

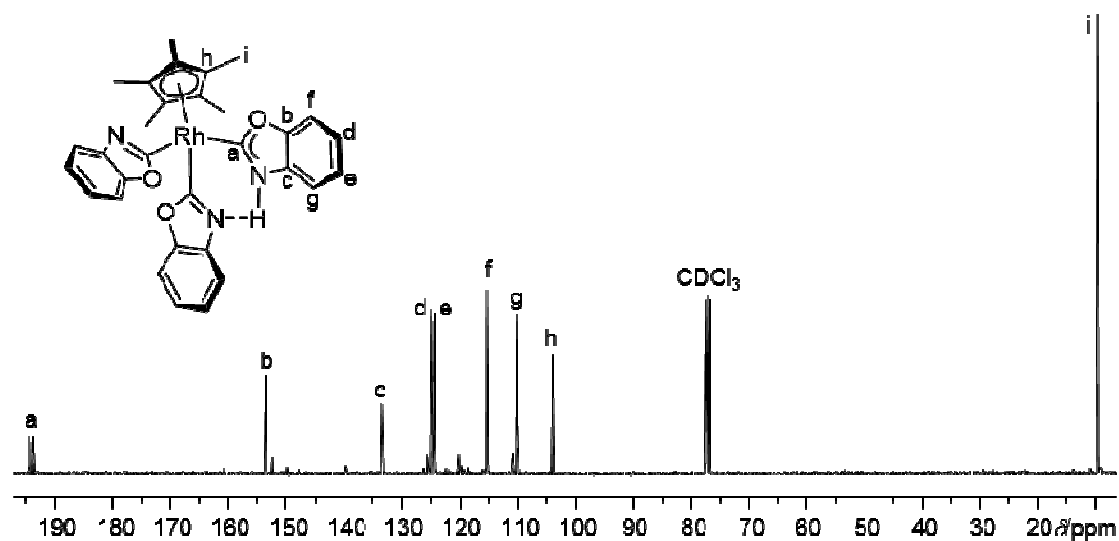

**Figure S4.**  $^{13}\text{C}\{^1\text{H}\}$  NMR spectrum of [3] in  $\text{CDCl}_3$ .

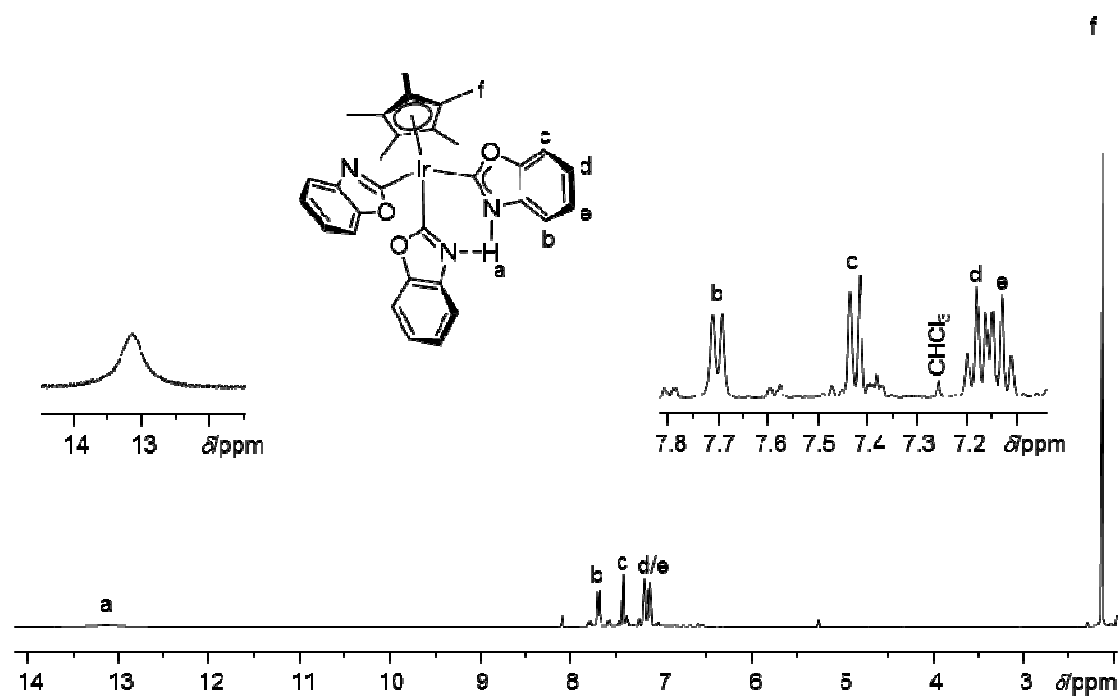

**Figure S5.**  $^1\text{H}$  NMR spectrum of [4] in  $\text{CDCl}_3$ .

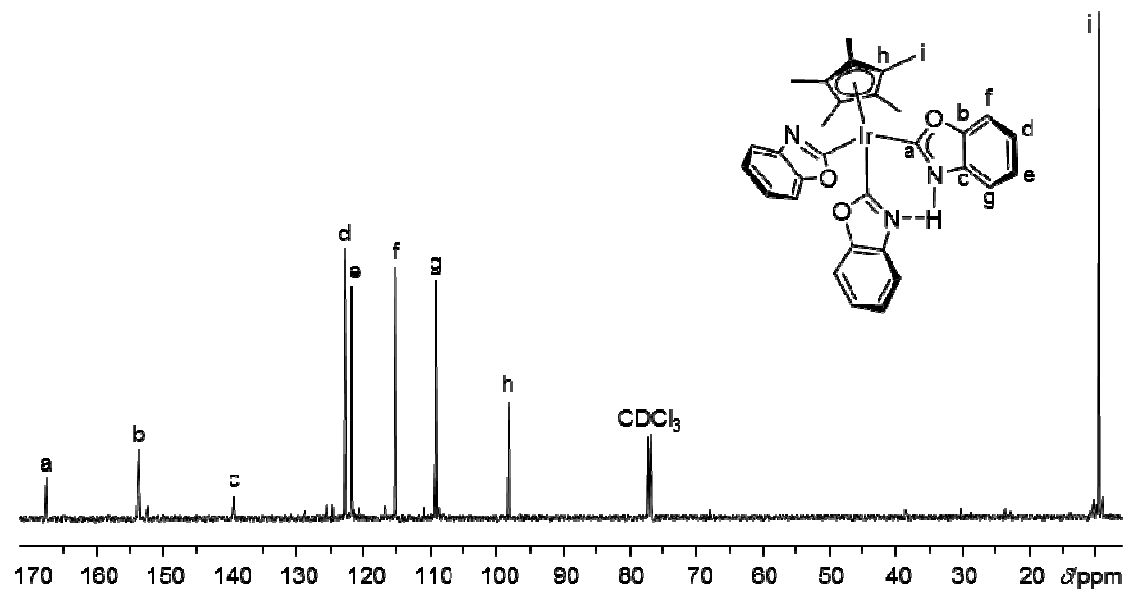

**Figure S6.**  $^{13}\text{C}\{^1\text{H}\}$  NMR spectrum of [4] in  $\text{CDCl}_3$ .

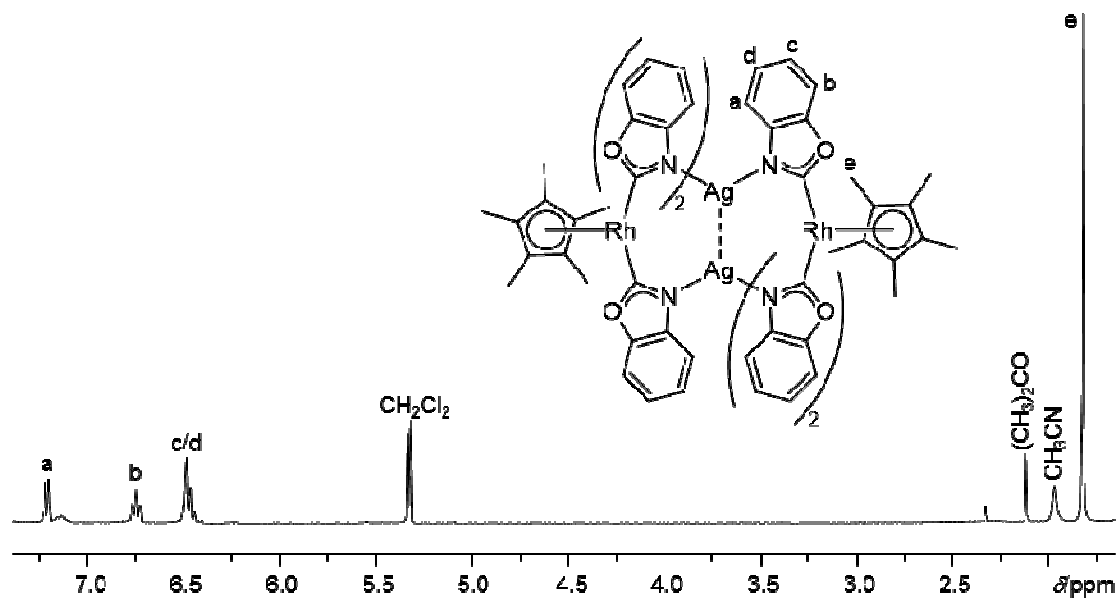

**Figure S7.**  $^1\text{H}$  NMR spectrum of [5] in  $\text{CD}_2\text{Cl}_2$ .

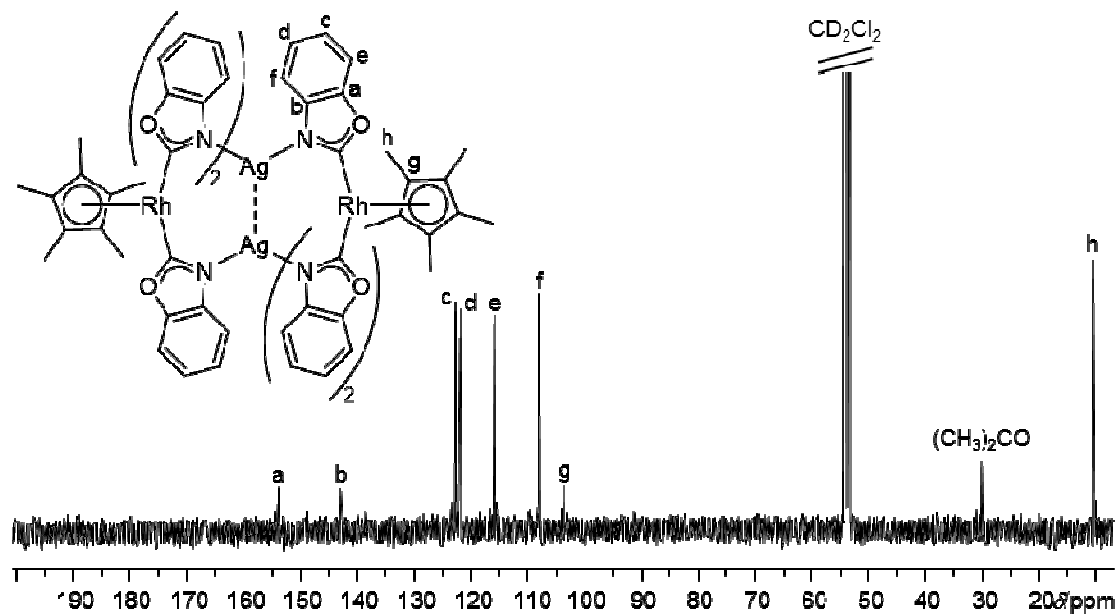

**Figure S8.**  $^{13}\text{C}\{^1\text{H}\}$  NMR spectrum of [5] in  $\text{CD}_2\text{Cl}_2$ . The resonance for the carbene carbon atoms (C2) was not observed.

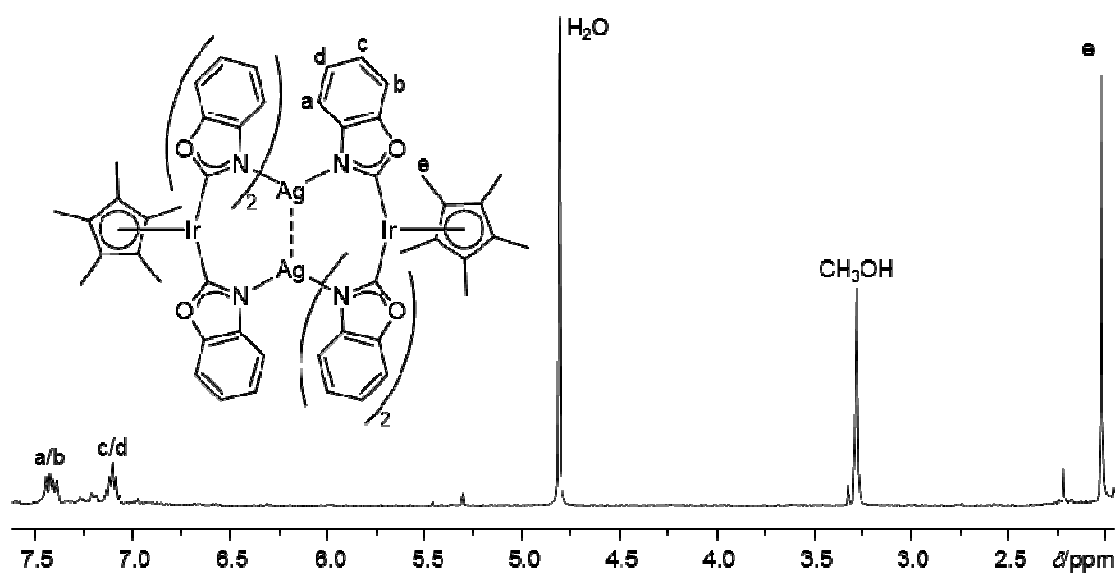

**Figure S9.**  $^1\text{H}$  NMR spectrum of [6] in  $\text{CD}_3\text{OD}$ .

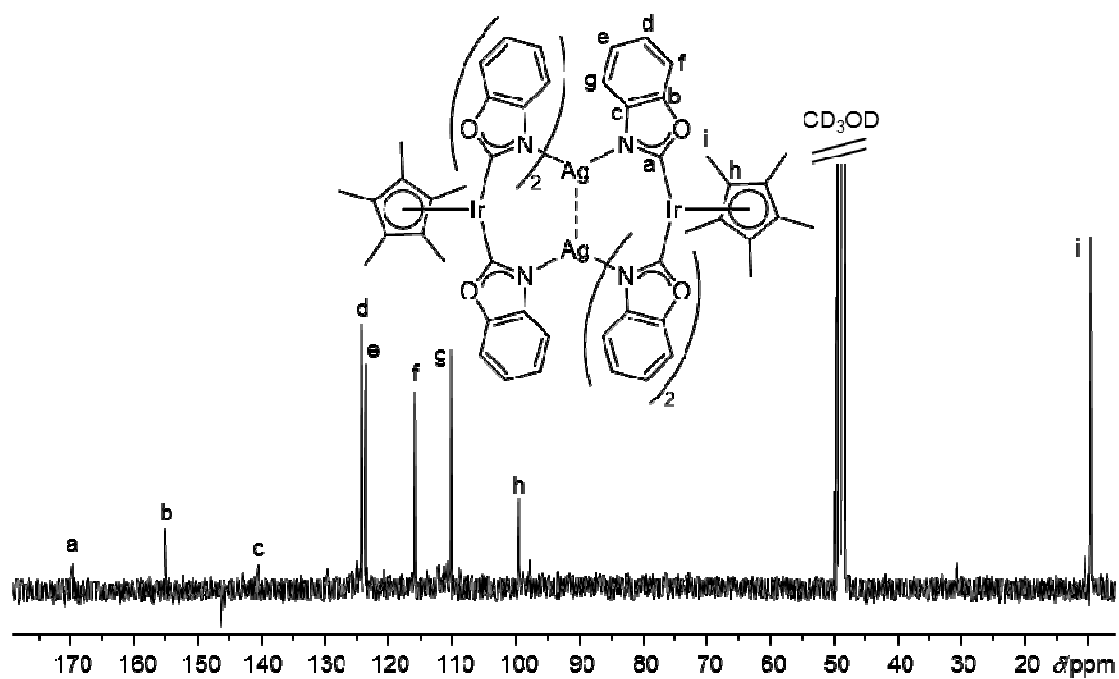

**Figure S10.**  $^{13}\text{C}\{^1\text{H}\}$  NMR spectrum of [6] in  $\text{CD}_3\text{OD}$ .

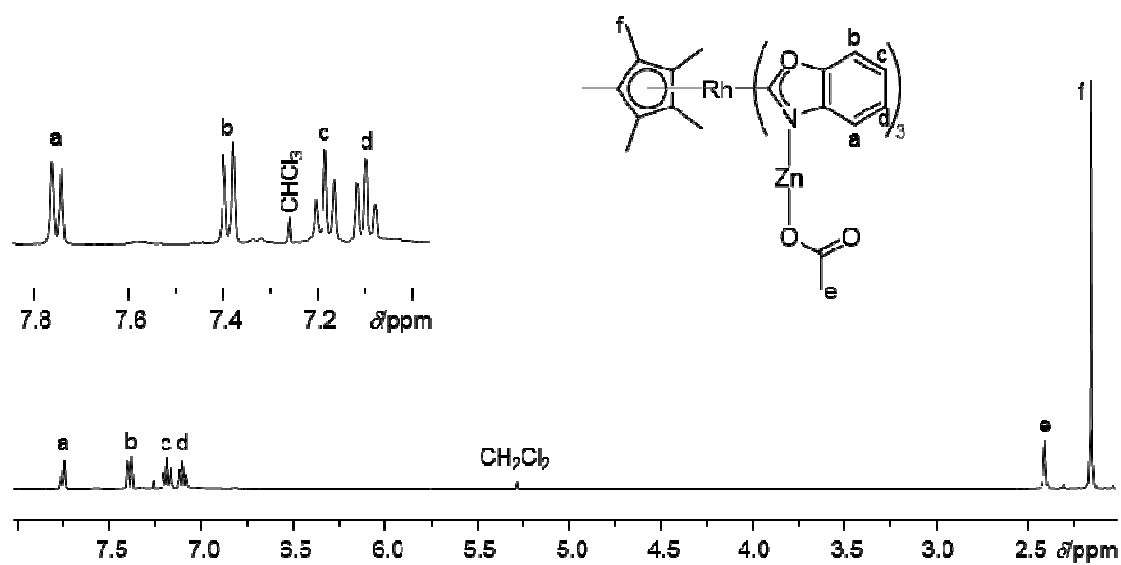

**Figure S11.**  $^1\text{H}$  NMR spectrum of [10] in  $\text{CDCl}_3$ .

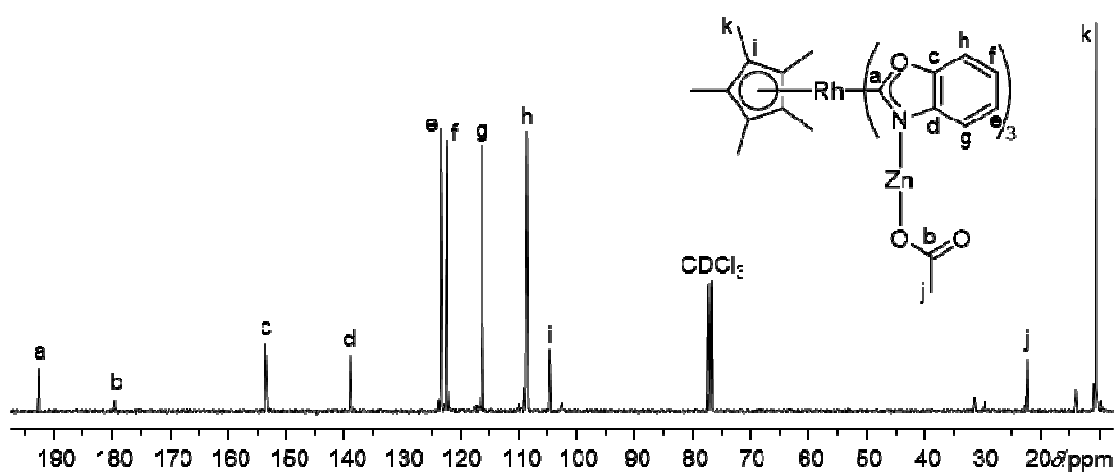

**Figure S12.**  $^{13}\text{C}\{^1\text{H}\}$  NMR spectrum of [10] in  $\text{CDCl}_3$ .
